# Supplementary material
Source: publisher figshare collection journal article supplement (https://aacr.figshare.com/articles/dataset/_/22353774)
Supplement: Supplementary file 1 [file 39778299]

## Figure S2. Schema for study design
